# Supplementary material
Source: PubMed Central journal article supplement (PMC4129519)
Supplement: NIHMS598735-supplement-suppl__fig_2.pdf [file NIHMS598735-supplement-suppl__fig_2.pdf]

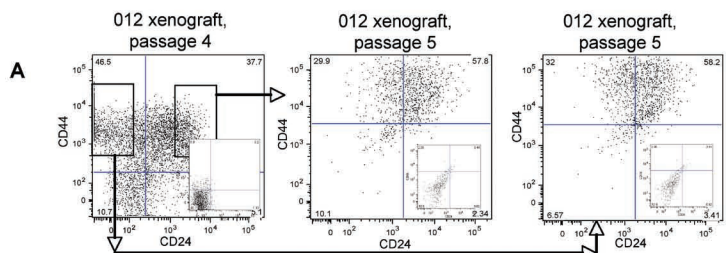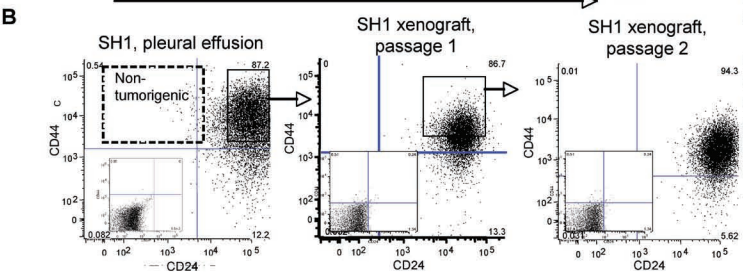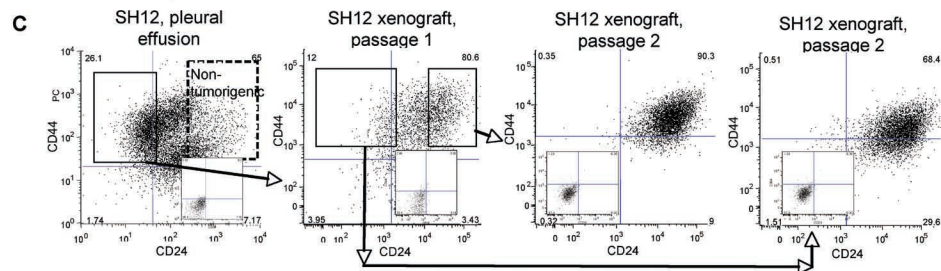

**Supplemental Figure 2.** Tumorigenicity of CD44posCD24neg and CD44posCD24pos cells in ER negative tumors and xenografts. A, Both CD44posCD24neg and CD44posCD24pos cells formed passage 5 xenografts with as few as 500 cells. Resulting xenografts were capable of in vivo passage B, CD44posCD24pos cells sorted from ER negative pleural effusion SH1 gave rise to tumors with as few as 1,000 cells. Resulting xenografts were capable of in vivo passage. C, CD44posCD24pos cells sorted from ER negative pleural effusion SH12 were non-tumorigenic. Both CD44posCD24pos and CD44posCD24neg cells sorted from passage one SH12 xenografts (established with CD44posCD24neg cells) were capable of initiating tumors with as few as 250 cells. Xenografts derived from both CD44posCD24pos and CD44posCD24neg cells could be passaged in vivo. In all cases, the inset graphs represents live (7AAD negative), lineage negative compensated cells used for defining gates.
