# Supplementary material
Source: PubMed Central journal article supplement (PMC4129519)
Supplement: NIHMS598735-supplement-suppl__fig_3.pdf [file NIHMS598735-supplement-suppl__fig_3.pdf]

Presort Analysis

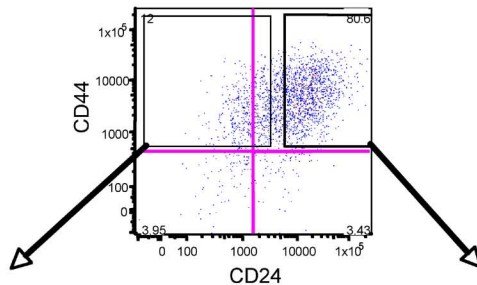

Post-sort Analysis

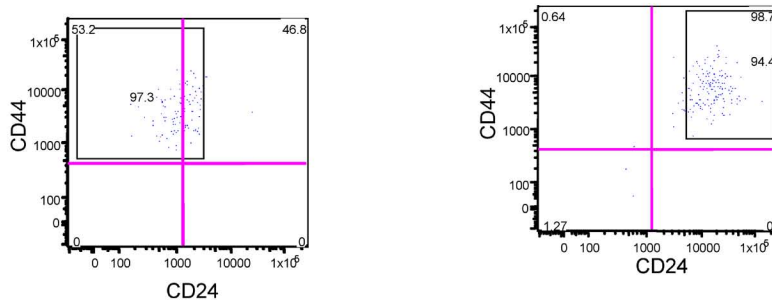

**Supplemental Figure 3.** Representative pre- and post-sort analysis of a xenograft sorted based on CD44/CD24 expression. Immediately following sorting into CD44posCD24neg and CD44posCD24pos populations, sorted cells were analyzed for purity of sort (bottom two panels).
