# Supplementary material
Source: PubMed Central journal article supplement (PMC4129519)
Supplement: NIHMS598735-supplement-suppl__fig_4.pdf [file NIHMS598735-supplement-suppl__fig_4.pdf]

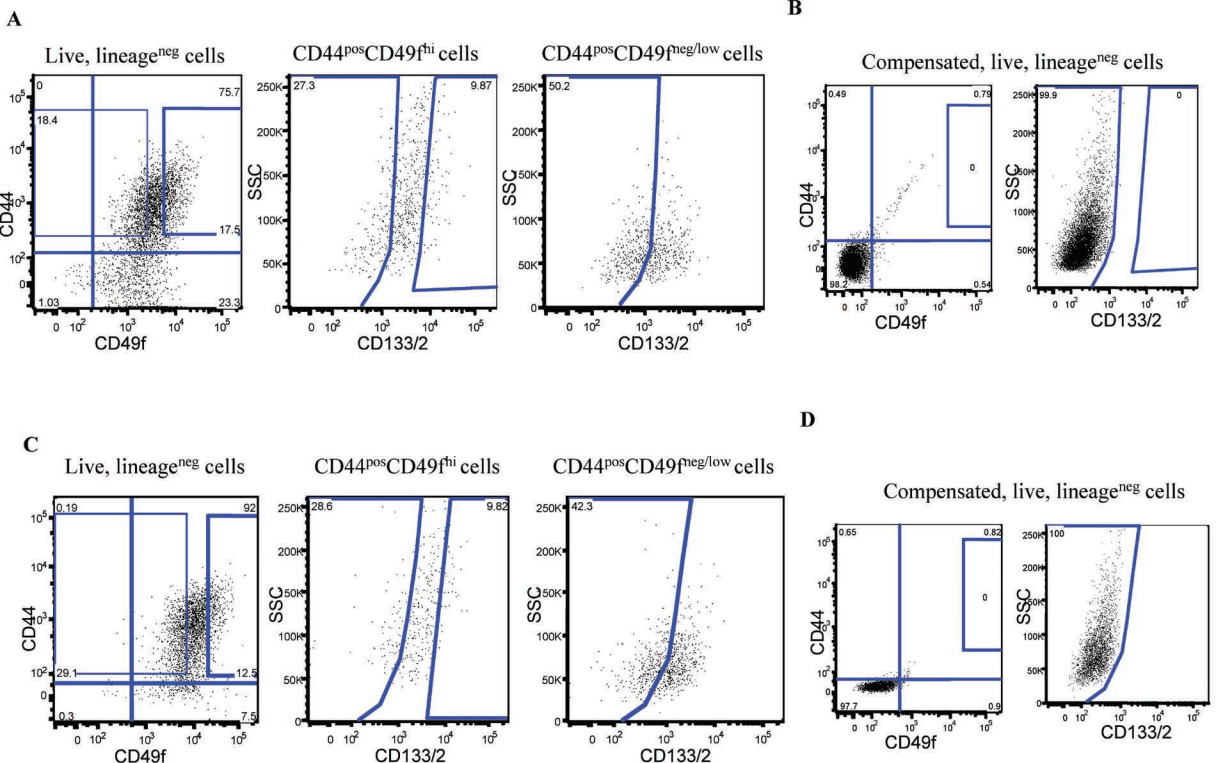

**Supplemental Figure 4.** Parental SH5 xenograft and secondary xenograft initiated with CD44<sup>pos</sup>CD49f<sup>hi</sup>CD133/2<sup>hi</sup> cells. A, CD44, CD49f, and CD133/2 expression profile of live, lineage depleted xenograft cells initiated with unsorted SH5 pleural effusion cells. B, Compensated, live, lineage negative gating controls for cells described in A. C, CD44, CD49f, and CD133/2 expression profile of live, lineage depleted xenograft cells initiated with CD44<sup>pos</sup>CD49f<sup>hi</sup>CD133/2<sup>hi</sup> cells sorted from the xenograft described in A. D, Compensated, live, lineage negative gating controls for cells described in C.
