# Supplementary material
Source: PubMed Central journal article supplement (PMC4129519)
Supplement: NIHMS598735-supplement-suppl__fig_5.pdf [file NIHMS598735-supplement-suppl__fig_5.pdf]

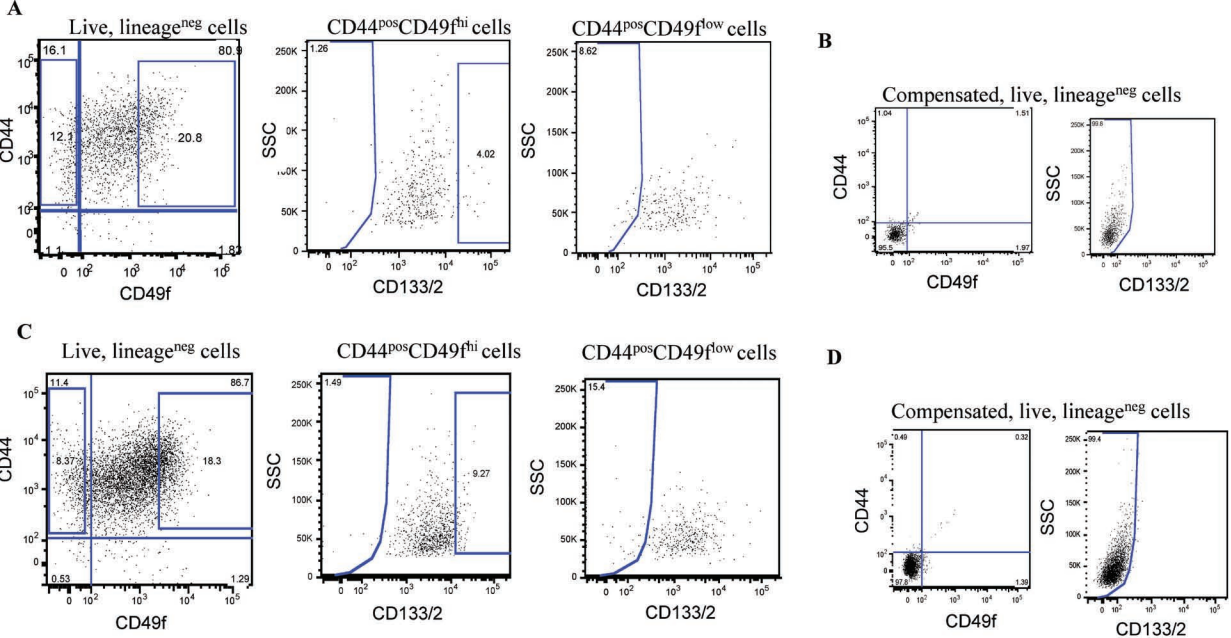

**Supplemental Figure 5.** Parental 012 xenograft and secondary xenograft initiated with CD44<sup>pos</sup>CD49f<sup>hi</sup>CD133/2<sup>hi</sup> cells. A, CD44, CD49f, and CD133/2 expression profile of live, lineage depleted xenograft cells initiated with a primary tumor fragment. B, Compensated, live, lineage negative gating controls for cells described in A. C, CD44, CD49f, and CD133/2 expression profile of live, lineage depleted xenograft cells initiated with CD44<sup>pos</sup>CD49f<sup>hi</sup>CD133/2<sup>hi</sup> cells sorted from the xenograft described in A. D, Compensated, live, lineage negative gating controls for cells described in C.
