# Supplementary material
Source: PubMed Central journal article supplement (PMC4129519)
Supplement: NIHMS598735-supplement-suppl__fig_6.pdf [file NIHMS598735-supplement-suppl__fig_6.pdf]

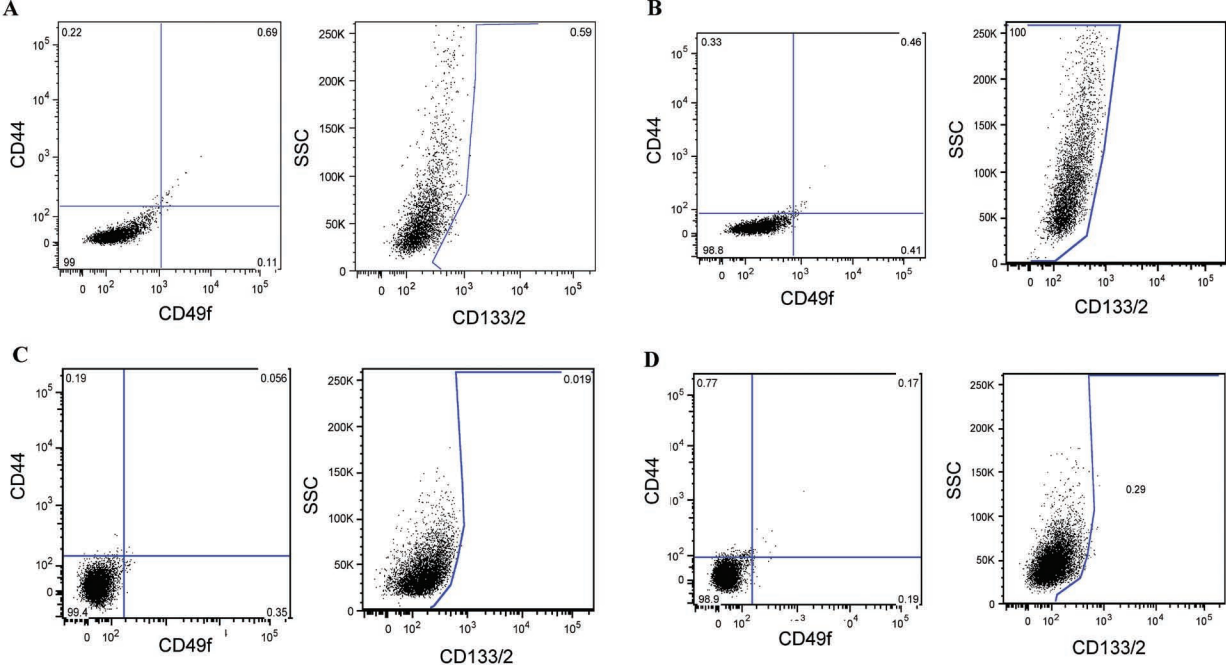

**Supplemental Figure 6.** Gating scheme for SH12 and SH1 tumors shown in Figure 2. A, Compensated, live, lineage negative gating controls for SH12 pleural effusion in Figure 2A. B, Compensated, live, lineage negative gating controls for SH12 passage 1 xenograft in Figure 2A. C, Compensated, live, lineage negative gating controls for SH1 passage 1 xenograft in Figure 2A. D, Compensated, live, lineage negative gating controls for SH1 passage 2 xenograft in Figure 2A.
