# Supplementary material
Source: PubMed Central journal article supplement (PMC4129519)
Supplement: NIHMS598735-supplement-suppl__fig_7.pdf [file NIHMS598735-supplement-suppl__fig_7.pdf]

A

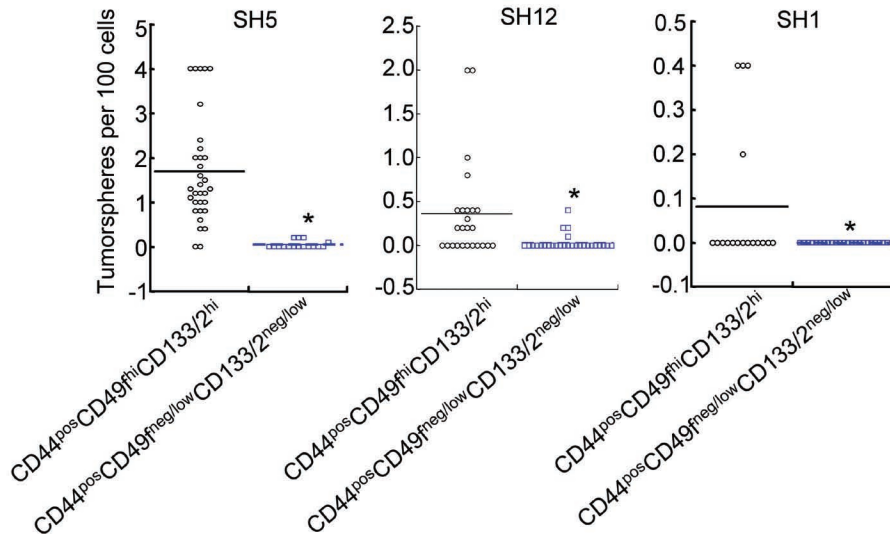

B

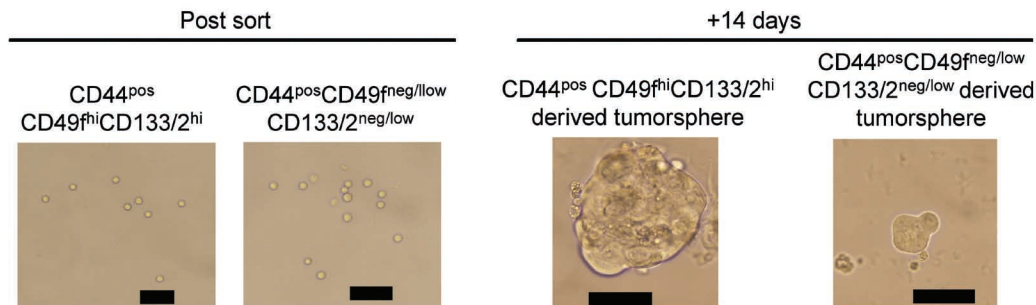

**Supplemental Figure 7.** Efficiency of tumorsphere formation by sorted xenografts. A, Frequency of tumorsphere forming cells in populations sorted from three xenografts. \* P < 0.05. B, Morphology of freshly sorted CD44<sup>pos</sup>CD49<sup>fhi</sup>CD133/2<sup>hi</sup> and CD44<sup>pos</sup>CD49<sup>fneg/low</sup>CD133/2<sup>neg/low</sup> cells. Tumorspheres from the latter population are smaller than those derived from CD44<sup>pos</sup>CD49<sup>fhi</sup>CD133/2<sup>hi</sup> cells. Bars represent 50 microns.
