# Supplementary material
Source: PubMed Central journal article supplement (PMC4129519)
Supplement: NIHMS598735-supplement-suppl__fig_9.pdf [file NIHMS598735-supplement-suppl__fig_9.pdf]

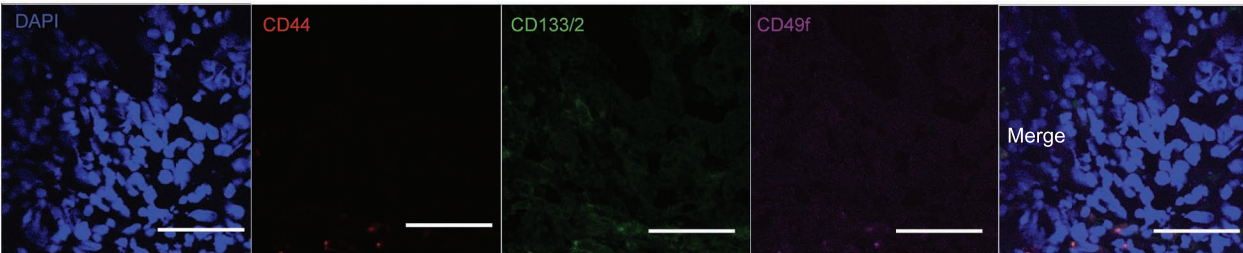

Supplemental Figure 9. Negative controls for confocal imaging of CD44, CD49f, and CD133. Bar represents 50 microns.
